# Supplementary material
Source: PubMed Central journal article supplement (PMC4233177)

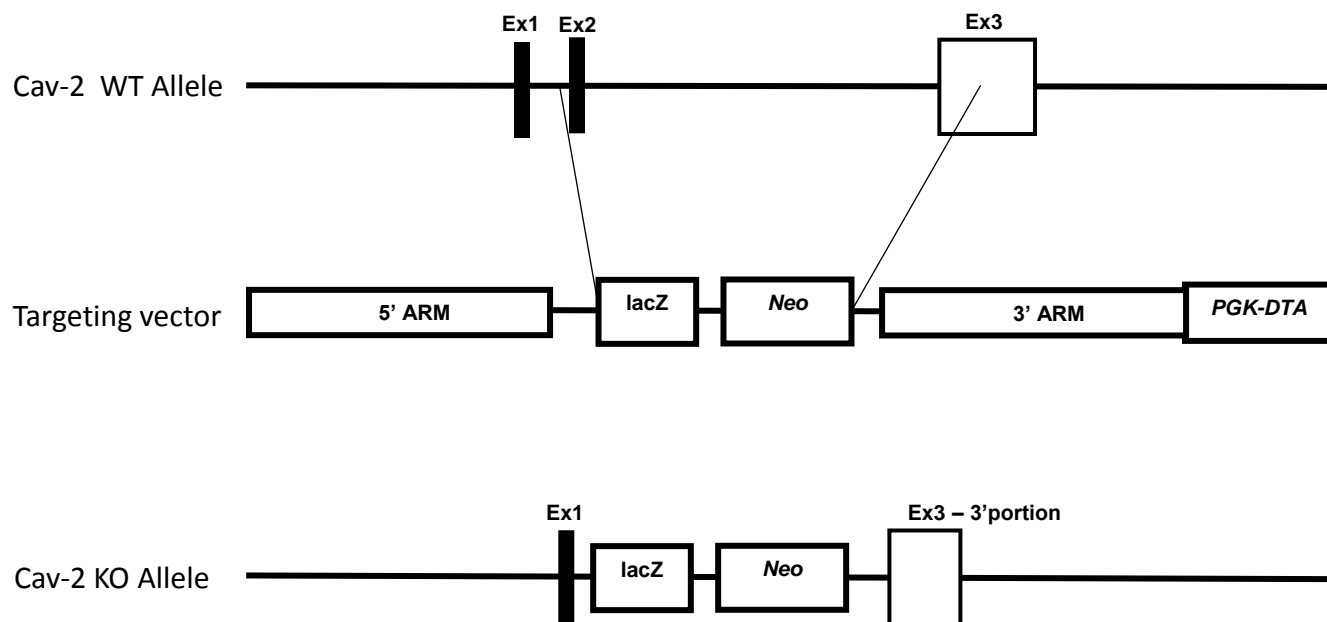

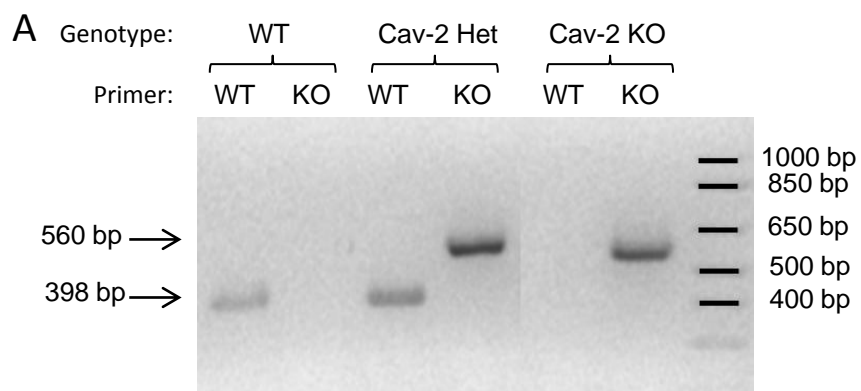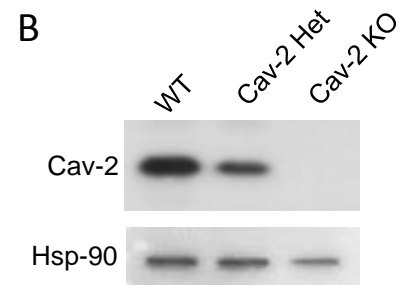

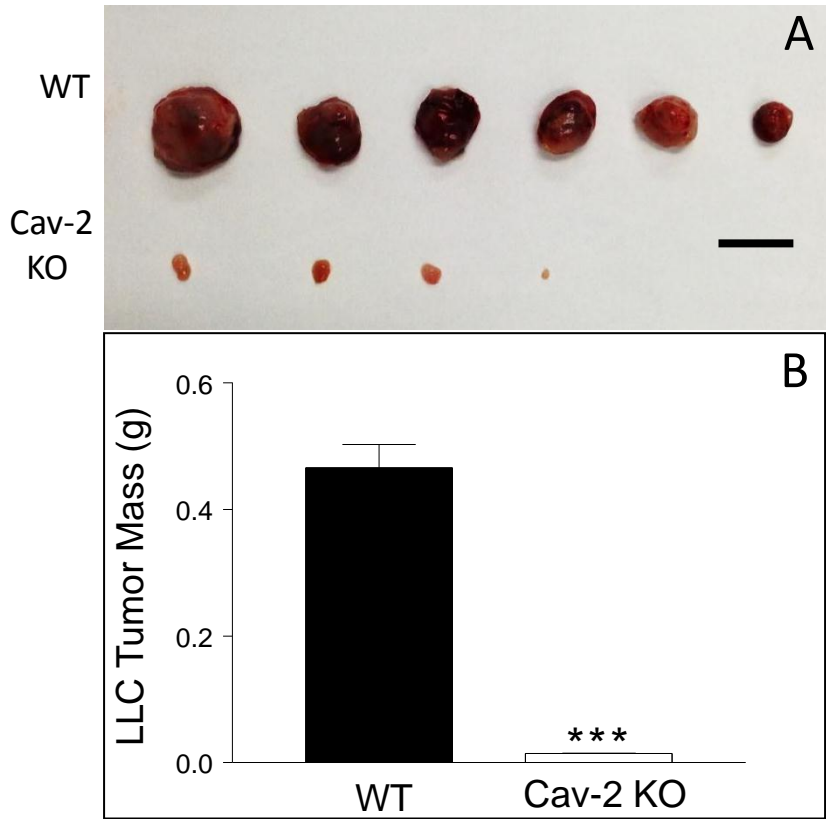

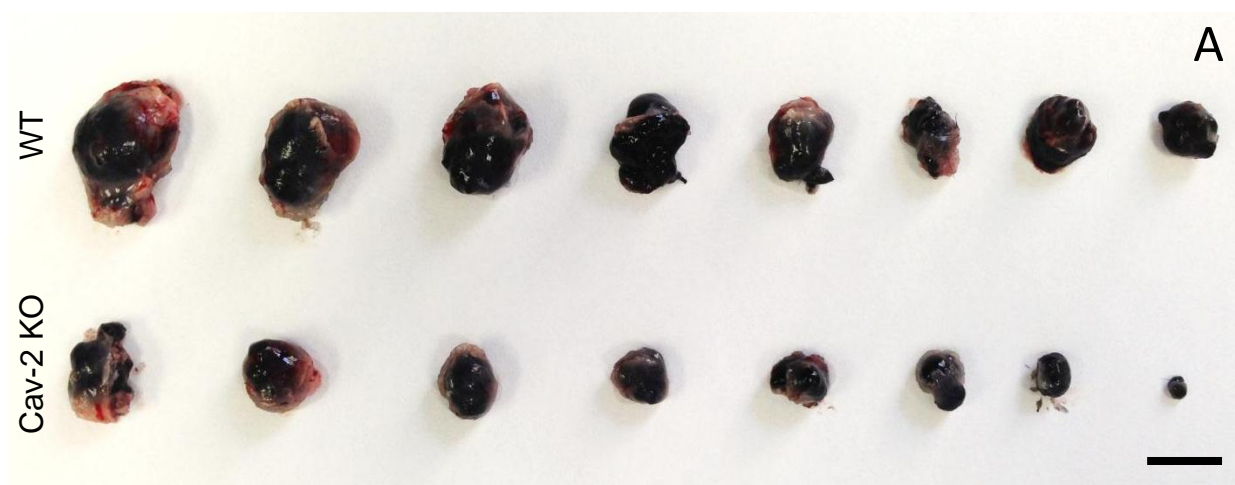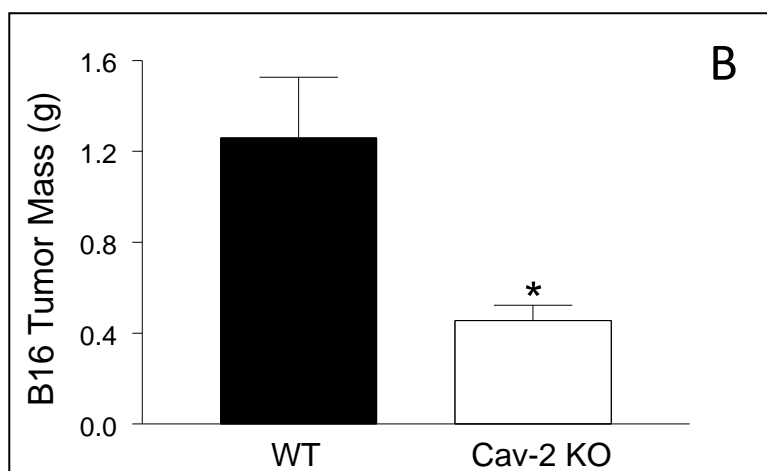

CD31

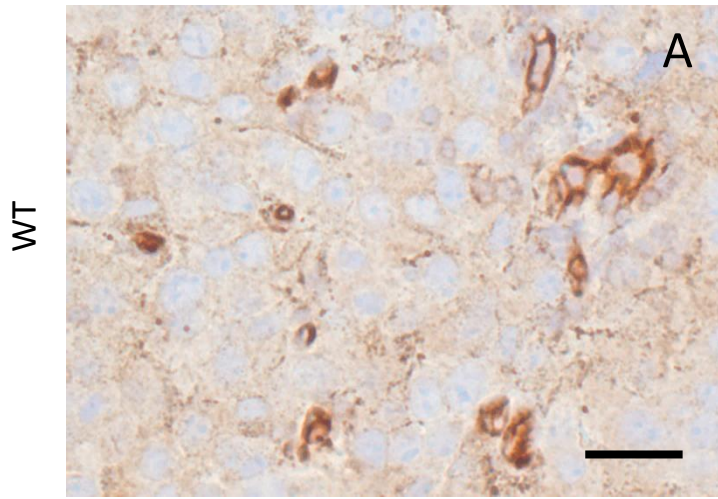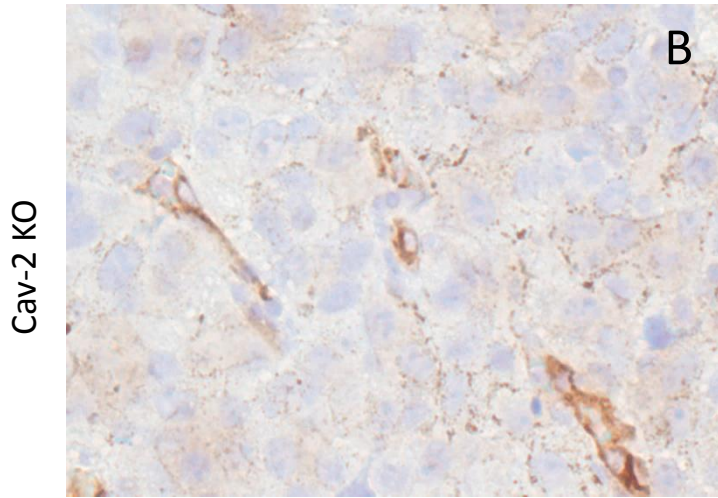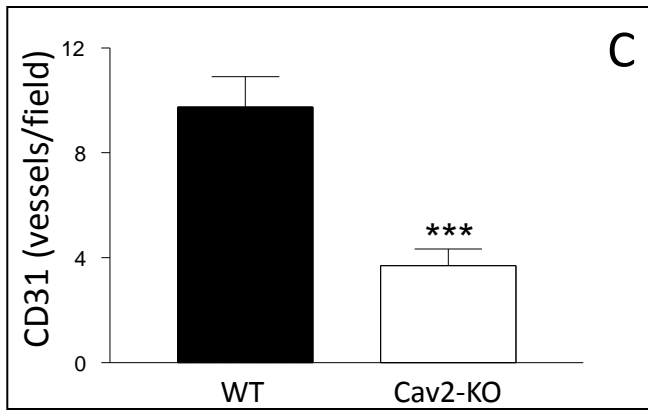

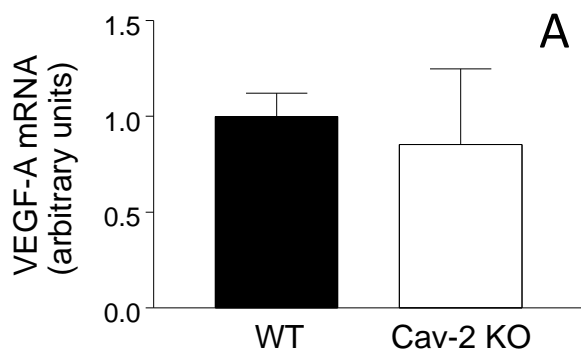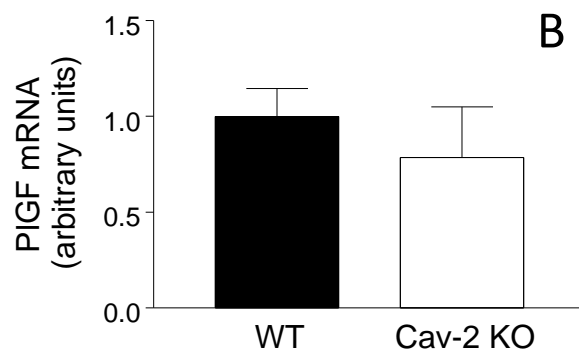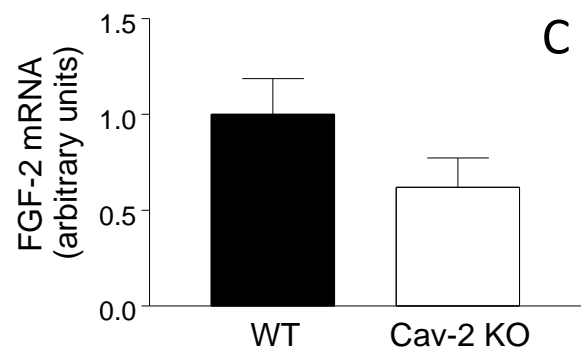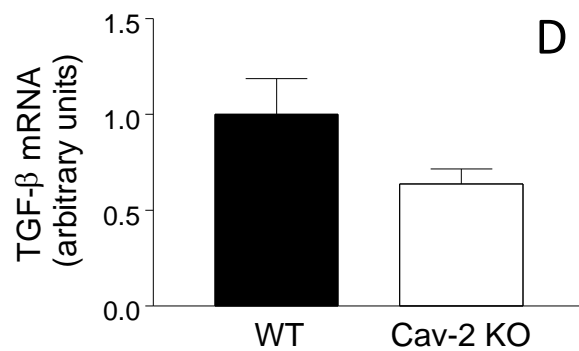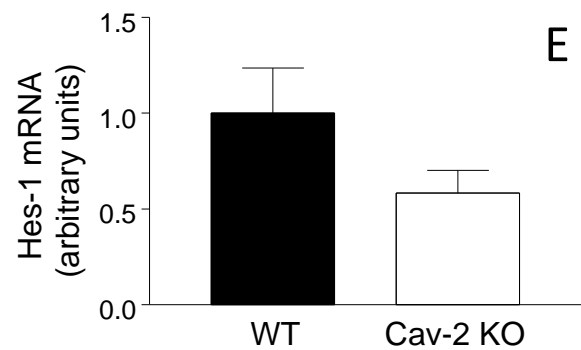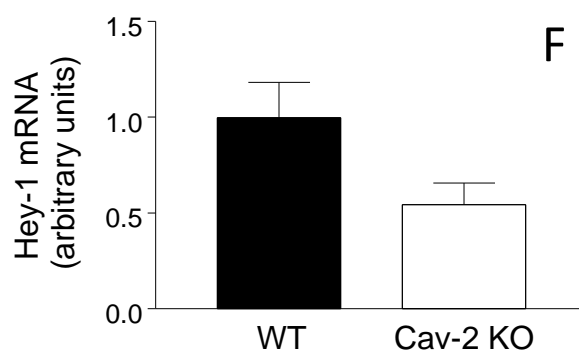

Supplement: NIHMS633087-supplement-3.pdf [file NIHMS633087-supplement-3.pdf]
